# Supplementary material for: Nutrient enrichment alters impacts of Hydrocotyle vulgaris invasion on native plant communities
Source: PubMed Central journal article supplement (PMC5172361; doi:10.1038/srep39468), 2016-12-20
Supplement: srep39468-s1.pdf [file srep39468-s1.pdf]

**Nutrient enrichment alters impacts of *Hydrocotyle vulgaris* invasion on native plant communities**

Lin Liu<sup>1</sup>, Han Quan<sup>1</sup>, Bi-Cheng Dong<sup>1</sup>, Xiang-Qi Bu<sup>1</sup>, Lin Li<sup>1</sup>, Fu-De Liu<sup>2</sup>,  
Guang-Chun Lei<sup>1</sup>, Hong-Li Li<sup>1\*</sup>

1 School of Nature Conservation, Beijing Forestry University, Beijing 100083, China

2 School of Environmental Science and Safety Engineering, Tianjin University of  
Technology, Tianjin 300384, China

\*corresponding author: Hong-Li Li ([lihongli327@163.com](mailto:lihongli327@163.com))

**Supplementary Table S1.** Summary of ANOVAs for the effects of *H. vulgaris* invasion and nutrient level on No. of seedling establishments among containers for each species.

|                                        | Invasion (I)             |              | Nutrient level (N)       |          | I × N                    |          |
|----------------------------------------|--------------------------|--------------|--------------------------|----------|--------------------------|----------|
|                                        | <i>F</i> <sub>1,20</sub> | <i>P</i>     | <i>F</i> <sub>1,20</sub> | <i>P</i> | <i>F</i> <sub>1,20</sub> | <i>P</i> |
| <i>Setaria viridis</i>                 | 0.02                     | 0.895        | 0.55                     | 0.470    | 2.83                     | 0.112    |
| <i>Festuca arundinace</i>              | 0.06                     | 0.817        | 1.09                     | 0.312    | 0.33                     | 0.575    |
| <i>Poa pratensis</i>                   | 0.27                     | 0.610        | 0.55                     | 0.468    | 0.01                     | 0.942    |
| <i>Bromus inermis</i>                  | 0.23                     | 0.638        | 0.52                     | 0.483    | 0.47                     | 0.504    |
| <i>Trifolium repens</i>                | 0.25                     | 0.625        | 0.17                     | 0.683    | 0.34                     | 0.569    |
| <i>Astragalus sinicus</i> <sup>b</sup> | <b>9.87</b>              | <b>0.006</b> | 0.78                     | 0.391    | 0.45                     | 0.511    |
| <i>Plantago asiatica</i> <sup>b</sup>  | 0.67                     | 0.427        | 0.05                     | 0.828    | 0.06                     | 0.804    |
| <i>Oxalis corniculata</i>              | 3.88                     | 0.066        | 0.01                     | 0.926    | 0.00                     | 1.000    |

Values are in bold if  $P < 0.01$  and in italics if  $P < 0.05$ . See Supplementary Figure S1 for data. <sup>b</sup> indicates square root transformed data.

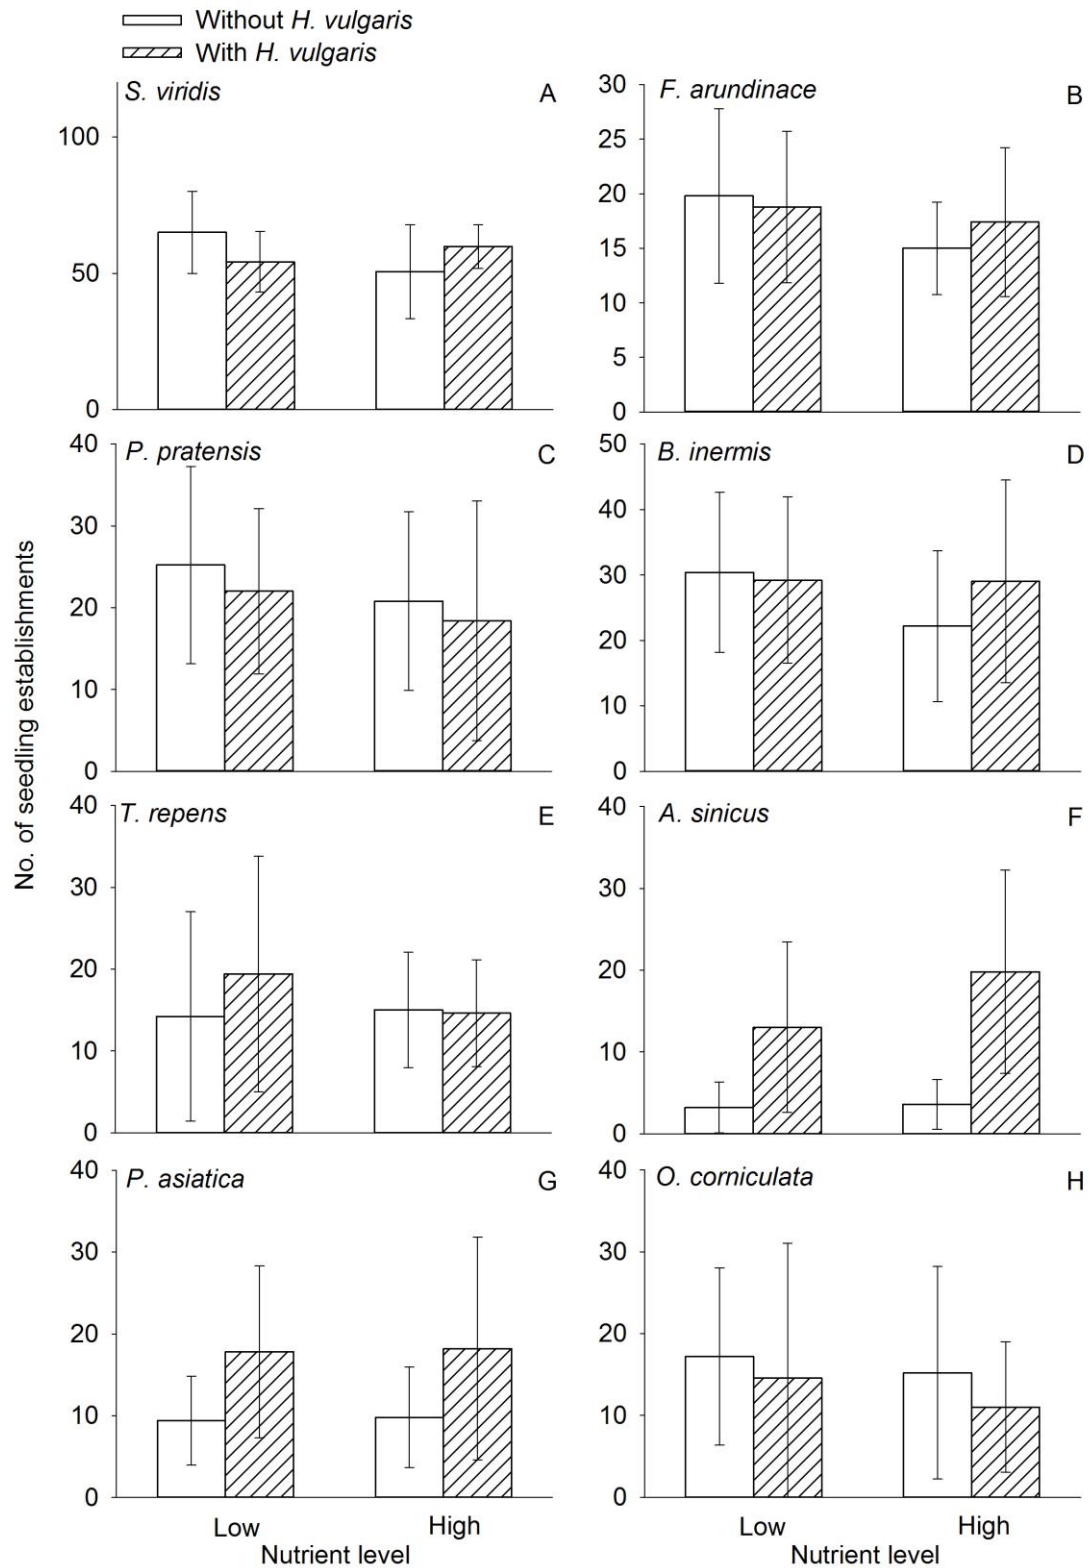

**Supplementary Figure S1.** Effects of *H. vulgaris* invasion and nutrient level on No. of seedling establishments among containers for each species (mean  $\pm$  SE). See Supplementary Table S1 for ANOVA summaries.
